# Supplementary material for: Atherogenic Index of Plasma and Its Association with Risk Factors of Coronary Artery Disease and Nutrient Intake in Korean Adult Men: The 2013–2014 KNHANES
Source: MDPI journal article supplement (doi:10.3390/nu14051071), 2022-03-03
Supplement: s1 [file s1]

**Table S1.** Lipid intake of subfood in the group of milk and dairy products according to quartile of AIP (adjusted for energy intake, age, BMI, smoking and physical activity).

|               | Quartiles of AIP  |                   |                   |                   | Total<br>( <i>n</i> = 1292) | <i>p</i> -Value | <i>p</i> for<br>Trend |
|---------------|-------------------|-------------------|-------------------|-------------------|-----------------------------|-----------------|-----------------------|
|               | Q1                | Q2                | Q3                | Q4                |                             |                 |                       |
|               | ( <i>n</i> = 322) | ( <i>n</i> = 324) | ( <i>n</i> = 323) | ( <i>n</i> = 323) |                             |                 |                       |
|               | <-0.38            | -0.38 to 0.09     | 0.09 to 0.54      | ≥0.54             |                             |                 |                       |
| Milk (g)      | 2.85±0.48         | 1.73±0.22         | 1.82±2.97         | 1.49±0.38         | 2.04±0.18                   | 0.035           | 0.009                 |
| Ice cream (g) | 1.02±0.30         | 0.88±0.23         | 0.47±0.13         | 0.60±0.16         | 0.74±0.14                   | 0.099           | 0.062                 |
| Yogurt (g)    | 0.31±0.08         | 0.16±0.06         | 0.17±0.05         | 0.11±0.05         | 0.19±0.03                   | 0.291           | 0.075                 |
| Cheese (g)    | 0.03±0.02         | 0.18±0.05         | 0.14±0.04         | 0.17±0.07         | 0.13±0.03                   | 0.074           | 0.117                 |
| Cream (g)     | 0.00±0.00         | 0.00±0.00         | 0.02±0.02         | 0.00±0.00         | 0.01±0.00                   | 0.795           | 0.323                 |
